# Supplementary material for: Early Growth Performance of In Vitro Raised Melia volkensii Gürke Plantlets in Response to Beneficial Microorganisms under Semi-Arid Conditions
Source: MDPI journal article supplement (doi:10.3390/plants11101300), 2022-05-13
Supplement: s1 [file s1]

**Supplement S1.** Colonization in potted *M. volkensii* seedlings from Kiambere: Pictures representing different forms of entry points with the hyphae at the point of penetrating the surface of the roots.

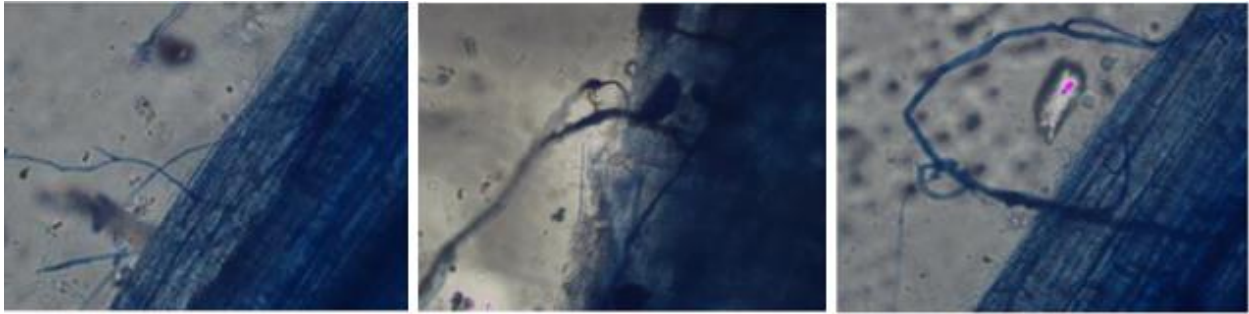

**Supplement S2.** Different Arbuscular Mycorrhiza Spore Morphotypes potted *M. volkensii* seedlings from Kiambere

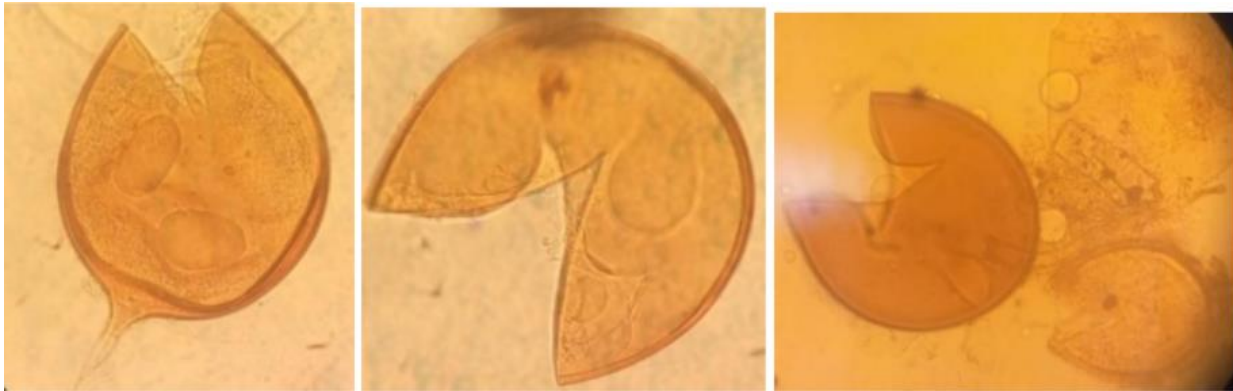

1. Glomoid type of spores

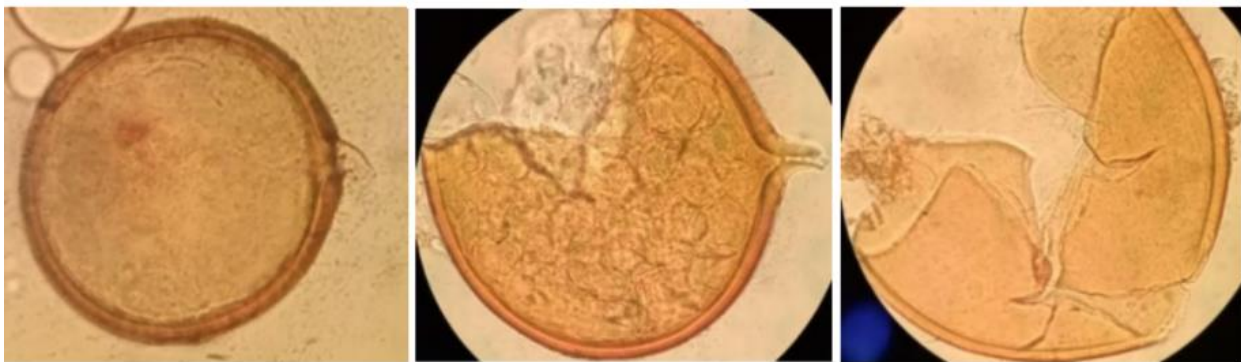

2. Glomoid spore type

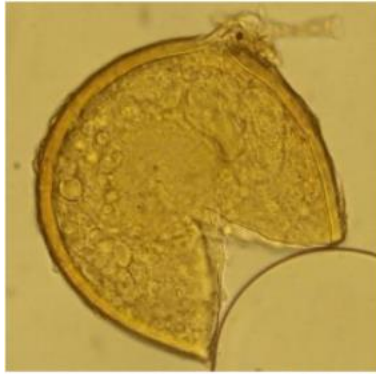

3. M1 Glomoid PVLG

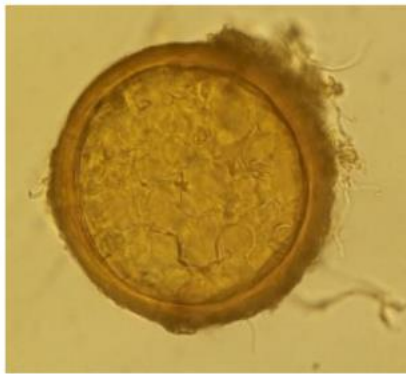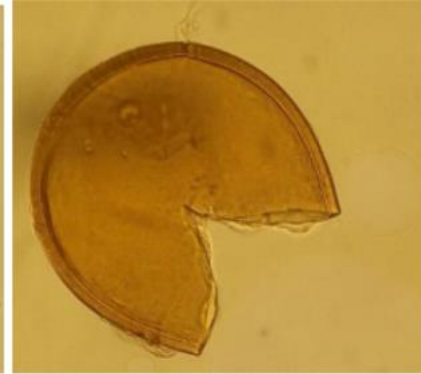

M1 Glomoid PVLG + Melzer

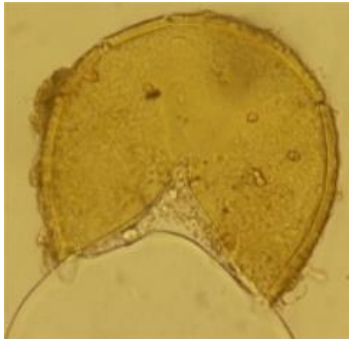

4. Glomoid PVLG

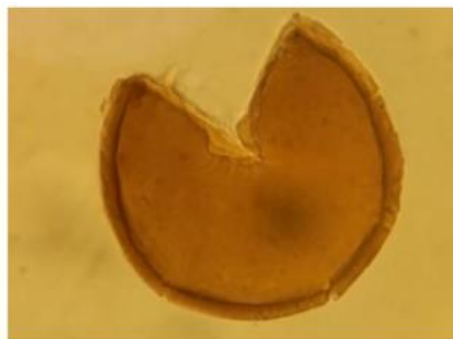

M1 Glomoid PVLG+ Melzer

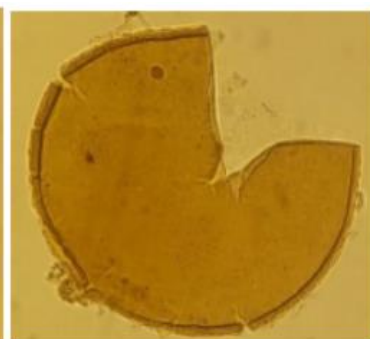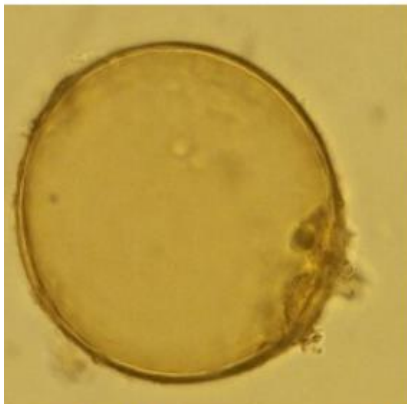

5. N91 Glomoid PVLG

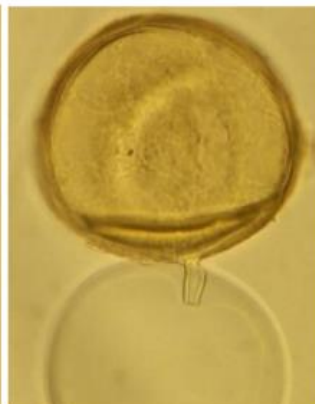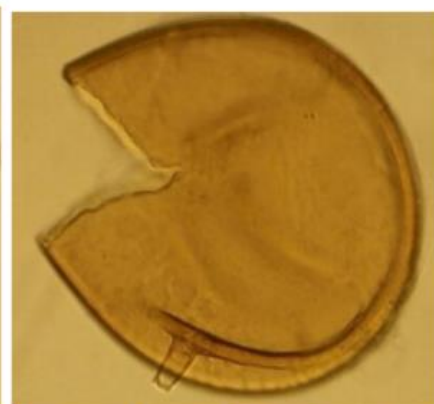

N91 Glomoid PVLG + Melzer

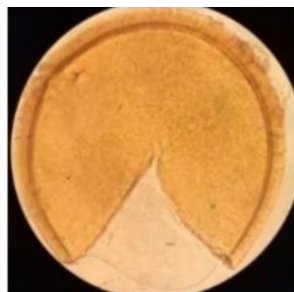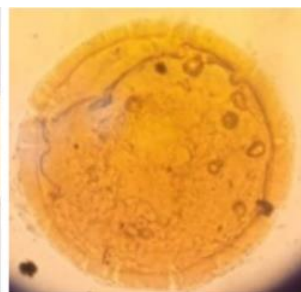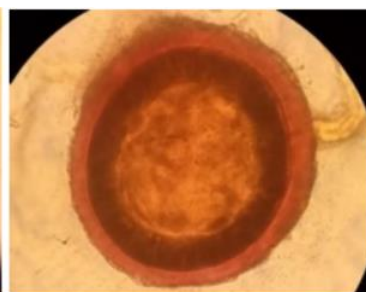

6. *Diversispora* sp. (With expanding walls), spore at center is parasitized and far right is stained with Melzer's reagent.



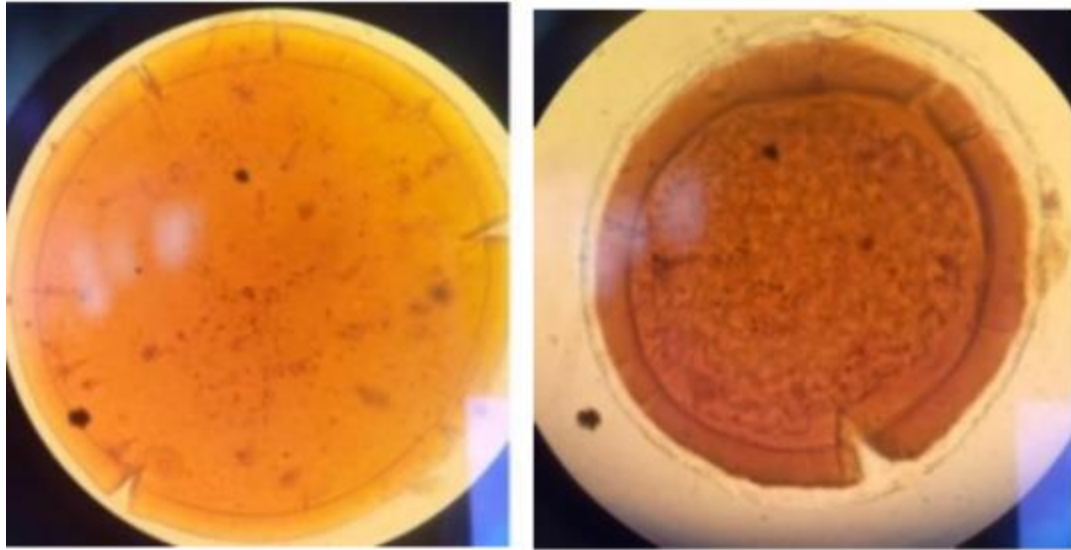

6. *Diversispora?* (Explanation as above)

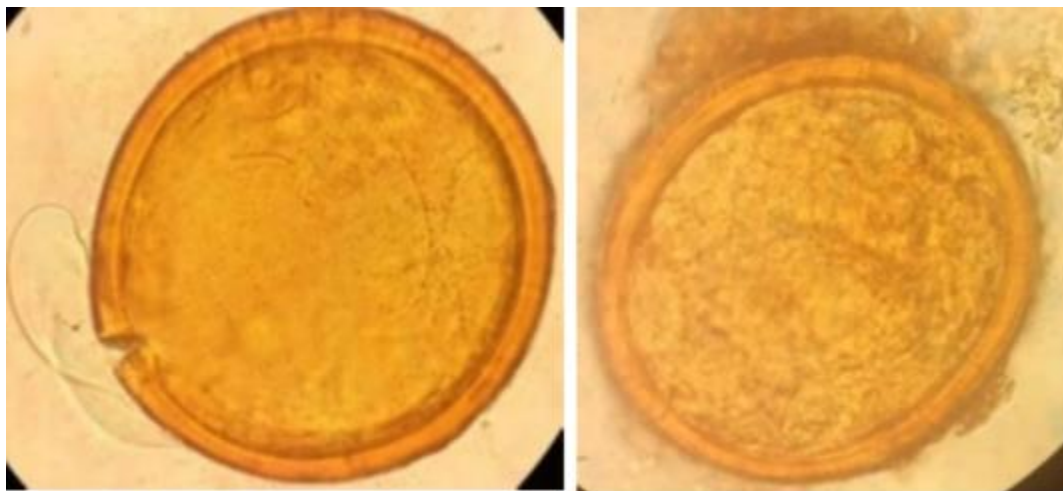

7. Glomoid species

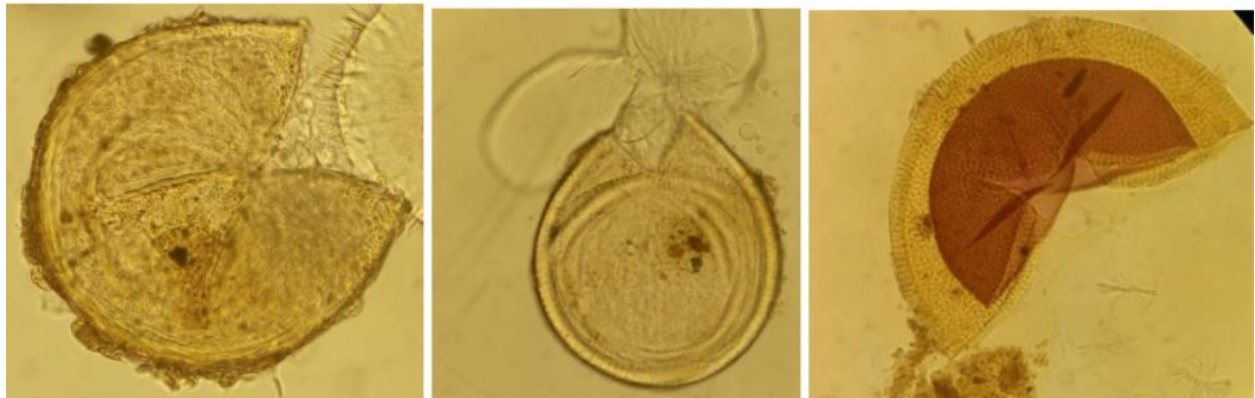

8. *Acaulospora scrobiculata* PVLG

PVLG + Melzer

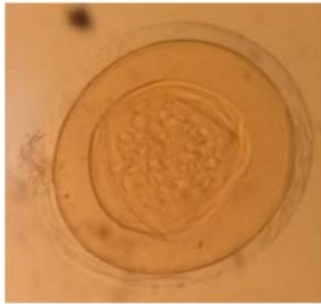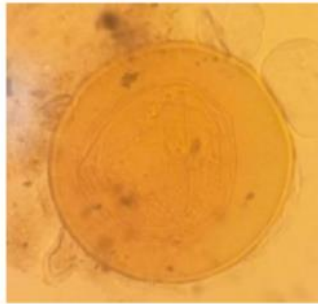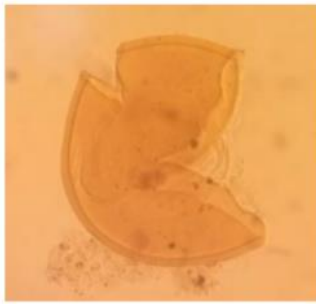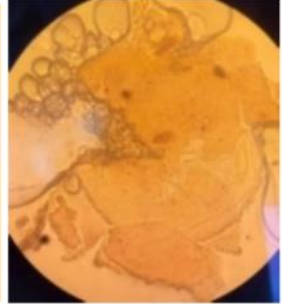

9. Acaulosporaceae

9. Acaulosporaceae

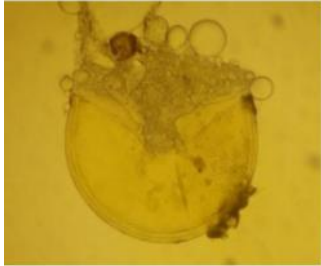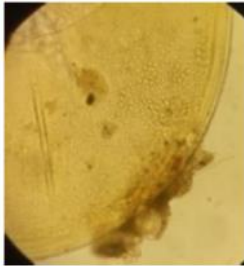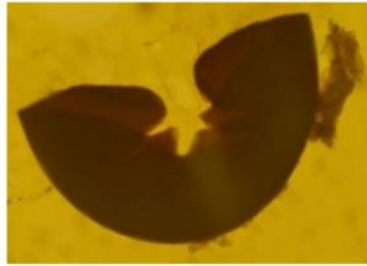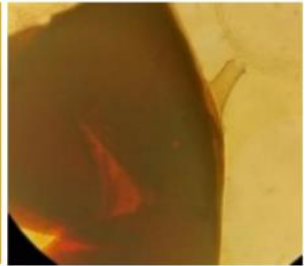

10. Gigasporaceae PVLG

Gigasporaceae PVLG + Melzers

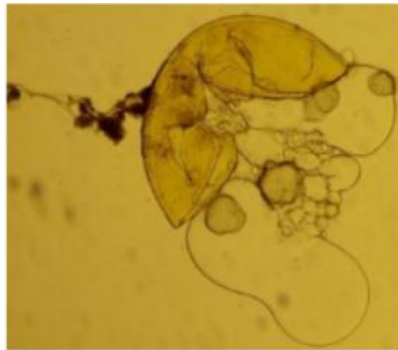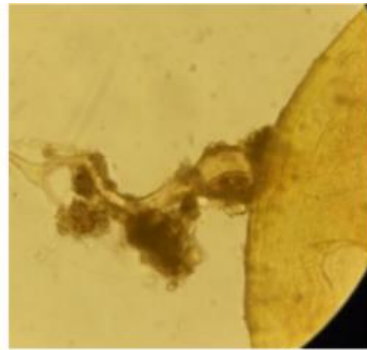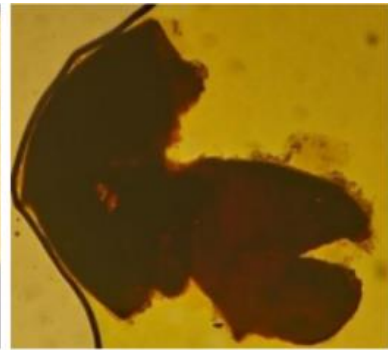

10. Gigasporaceae in PVLG

Gigasporaceae PVLG + Mel

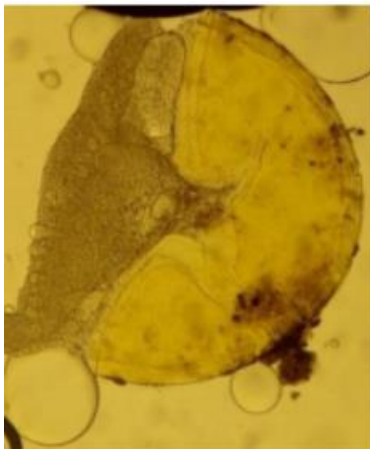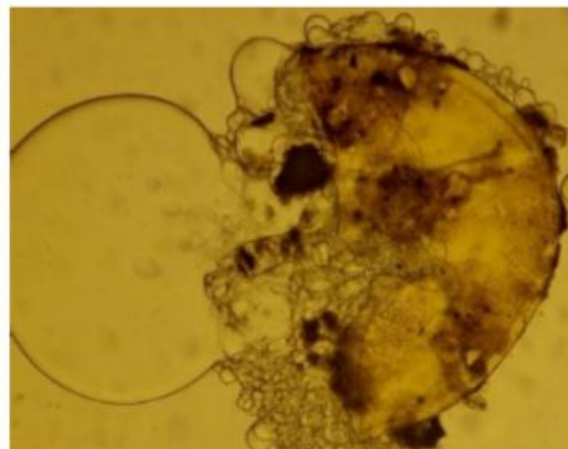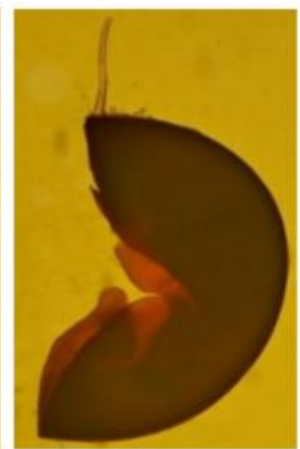

10. Gigasporaceae

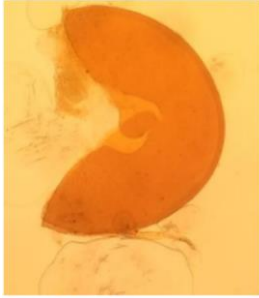

11. *Gigaspora margarita*

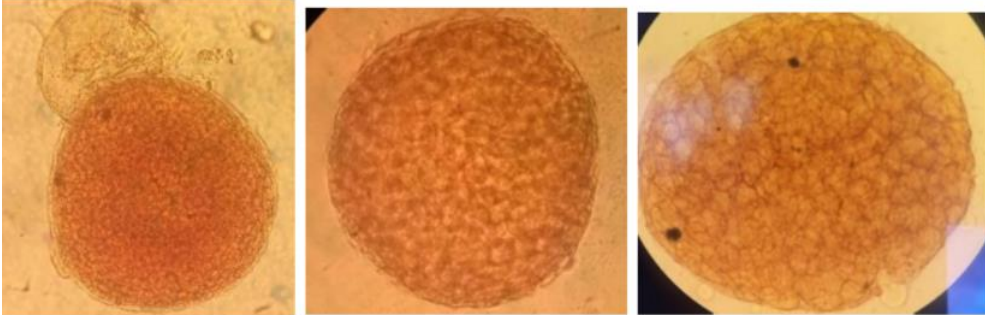

12. Uncertain Identity morphotype with defined shape and inner oily contents and ornamentation is consistent.

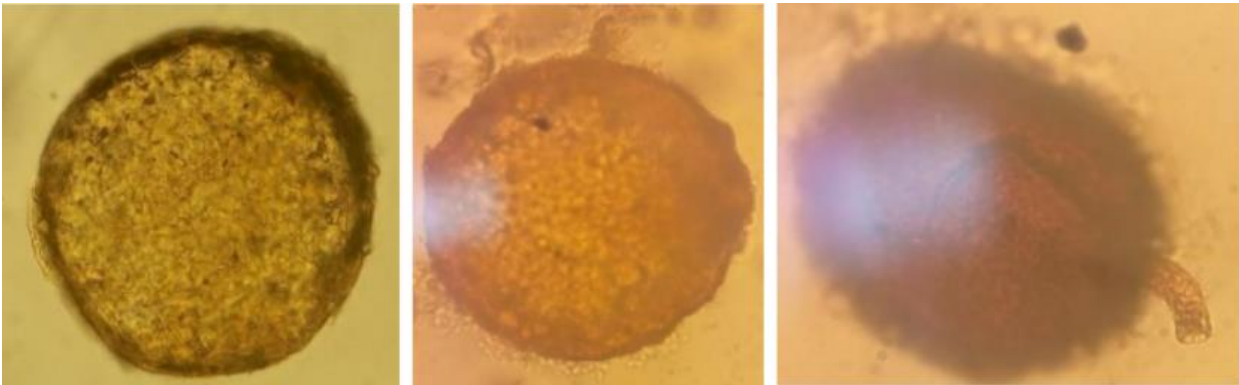

13. Sporocarp in formative stage with thin mycelial sheath?
